# Supplementary material for: SARS-CoV-2 gene content and COVID-19 mutation impact by comparing 44 Sarbecovirus genomes
Source: PubMed Central journal article supplement (PMC8113528; doi:10.1038/s41467-021-22905-7), 2021-05-11
Supplement: 41467_2021_22905_MOESM3_ESM.pdf [file 41467_2021_22905_MOESM3_ESM.pdf]

## Description of Additional Supplementary Files

File Name: Supplementary Data 1

Description: Tab-delimited table with one row for each of 44 *Sarbecovirus* strains used.

File Name: Supplementary Data 2

Description: Tab-delimited table with information on all confirmed or candidate genes and mature proteins of SARS-CoV-2.

File Name: Supplementary Data 3

Description: Tab-delimited table with information about each of the single nucleotide variants used in this study

File Name: Supplementary Data 4

Description: Tab-delimited table listing open reading frames searched for novel coding regions.

File Name: Supplementary Data 5

Description: Tab-delimited table with conservation of RNA modification sites.

File Name: Supplementary Data 6

Description: Tab-delimited table with enrichment analysis for conservation in RNA modification sites.

File Name: Supplementary Data 7

Description: Tab-delimited table with FRESCo output (synonymous and non-synonymous rates) for 9-codon windows.

File Name: Supplementary Data 8

Description: Tab-delimited table with FRESCo output (synonymous and non-synonymous rates) for 1-codon windows.

File Name: Supplementary Data 9

Description: Tab-delimited table with nucleotide identity between SARS-CoV-2 and other strains in 100-nt windows.

File Name: Supplementary Data 10

Description: Our proposed new reference gene set for SARSCoV-2, in BED format.

File Name: Supplementary Data 11

Description: The gene candidates that we rejected, in BED format.

File Name: Supplementary Data 12

Description: Whole-genome alignment of 44 *Sarbecovirus* genomes, in Fasta format.

File Name: Supplementary Data 13

Description: Whole-genome phylogenetic tree, in Newick format.

File Name: Supplementary Data 14

Description: Codon alignments used to run FRESCo for 1-codon windows, in FASTA format.

File Name: Supplementary Data 15

Description: Tab-delimited table with mutations distinguishing B.1.1.7, B.1.351, P.1, and P.2 lineages.

File Name: Supplementary Data 16

Description: List of authors who contributed genomes to GISAID that were used by Nextstrain and UCSC to produce the list of SNVs.
